# Supplementary material
Source: Research Square preprint supplement (doi:10.21203/rs.3.rs-9177895/v1)
Supplement: Supplementary file 1 [file 9abba2a392071ce77b6f3e48.docx]

**Supplemental material**

*Table S1: individual tumour volumes and group mean ± SD values of (cm³) for the EGFRvIII, WT, and sham groups.*

| **EGFRvIII tumour (n=8) cm3** | **WT tumour (n=3) cm3** | **Sham (n=2) cm3** |
| --- | --- | --- |
| 0.032 | 0.004 | - |
| 0.036 | 0.007 | - |
| 0.019 | 0.005 |  |
| 0.023 |  |
| 0.015 |
| 0.044 |
| 0.034 |
| 0.047 |
| **0.031 ± 0.011** | **0.005 ± 0.001** | **-** |

*Table S2: mean ± SD of kinetic parameters estimated using the irreversible two-tissue compartment model (2-TCM) and the Patlak model in EGFRvIII tumour, blocking, wild-type (WT) tumour, and sham groups.*

| **2-TCM-irrev** | | | | |
| --- | --- | --- | --- | --- |
|  | Ki (mL/cm3/min) | SE% Ki | K1 (mL/cm3/min) | SE% K1 |
| EGFRvIII tumour | 1.6E-05±1.1E-05 | 8.9E+01±1.5E+0.2 | 6.2E-05±2.9E-05 | 6.9E+00±6.9E-01 |
| Blocking | 6.2E-06±2.1E-06 | 1.6E+01±3.9E+00 | 5.3E-04±7.0E-04 | 4.6E+01±3.8E+01 |
| WT tumour | 4.9E-07±6.9E-07 | 9.9E+101±1.4E+102 | 2.8E-06±1.0E-06 | 1.0E+02±1.8E+00 |
| Sham | 2.8E-104±0 | 1.0E+104±0 | 1.8E-06±0 | 2.6E+06±0 |
|  | k2 (min-1) | SE% k2 | k3 (min-1) | SE% k3 |
| EGFRvIII tumour | 6.1E-04±3.3E-04 | 2.5E+01±8.4E+00 | 2.2E-04±1.6E-04 | 1.2E+02±1.7E+02 |
| Blocking | 6.0E-02±8.0E-02 | 5.5E+01±3.5E+01 | 5.8E-04±3.9E-04 | 3.3E+01±1.3E+00 |
| WT tumour | 3.7E-04±3.3E-04 | 6.7E+02±4.7E+02 | 1.2E-04±1.6E-04 | 1.0E+102±1.4+102 |
| Sham | 9.9E-06±0 | 3.5E+08±0 | 1.5E-103±0 | 1.0E+104±0 |
| **Patlak** | | | | |
|  | Ki (mL/cm3/min) | SE% Ki | Intercept (mL/cm3) | SE% Intercept |
| EGFRvIII tumour | 2.4E-05±9.4E-06 | 8.4E+00±1.1E+00 | 2.6E-02±1.1E+02 | 3.0E+01±6.1E+00 |
| Blocking | 6.4E-06±2.2E-06 | 1.2E+01±2.8E+00 | 1.4E-02±6.5E-03 | 2.1E+01±3.5E+00 |
| WT tumour | 1.4E-06±3.3E-07 | 1.6E+01±5.9E+00 | 2.4E-03±9.8E-04 | 4.4E+01±3.5E+01 |
| Sham | 1.7E-06±2.6E-07 | 3.7E+05±2.0E+04 | 1.6E-03±1.5E-04 | 1.5E+05±2.6E+04 |

**
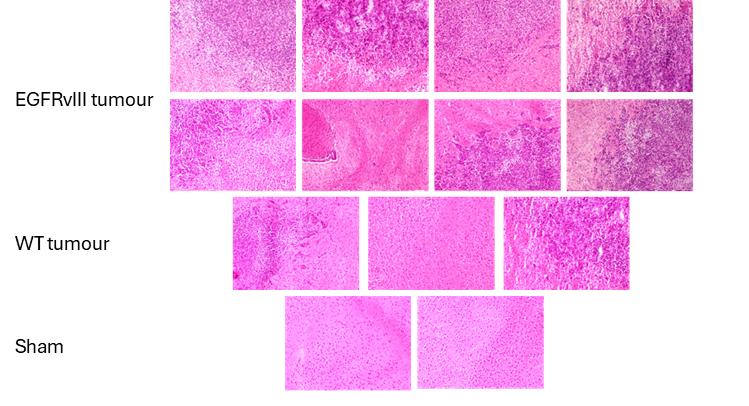
**

Figure S1: hematoxylin and eosin–stained brain sections from all animals in the EGFRvIII tumour, wild-type (WT) tumour, blocking tumour, and sham groups. All images were acquired using brightfield microscopy at 10× magnification.

**
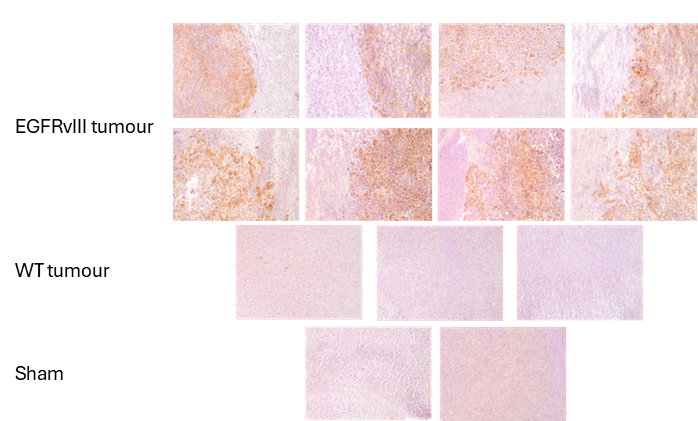
**

Figure S2: immunohistochemical detection of EGFRvIII expression in all animals from the EGFRvIII tumour, wild-type (WT) tumour, blocking tumour, and sham groups. All images were acquired using brightfield microscopy at 10× magnification.
